# Supplementary material for: Biosynthetic novelty index reveals the metabolic potential of rare actinobacteria isolated from highly oligotrophic sediments
Source: PubMed Central journal article supplement (PMC9973853; doi:10.1099/mgen.0.000921), 2023-01-20

**Supplementary table 1.** Genomic characteristics of rare taxonomic genera and endophytes used for biosynthetic novelty calculation.

| Accession Number | Genome Name                                              | Contigs | Genome Length | %GC  | BiNI   |
|------------------|----------------------------------------------------------|---------|---------------|------|--------|
| GCF_900115955.1  | <i>Lentzea waywayandensis</i> strain DSM 44232           | 39      | 10153412      | 68.9 | 334.4  |
| GCF_011067745.1  | <i>Lentzea alba</i> strain NEAU.D13                      | 42      | 10211123      | 68.7 | 267.5  |
| GCF_900100275.1  | <i>Lentzea albidocapillata</i> subsp. violacea DSM 44796 | 58      | 8671075       | 69   | 368.7  |
| GCF_900110985.1  | <i>Lentzea flaviverrucosa</i> strain CGMCC 4.578         | 34      | 9473544       | 69.2 | 188.1  |
| GCF_900104175.1  | <i>Lentzea jiangxiensis</i> strain CGMCC 4.6609          | 62      | 8591279       | 70.2 | 257.6  |
| GCF_900111005.1  | <i>Lentzea albida</i> strain DSM 44437                   | 43      | 9441135       | 70.2 | 439.3  |
| GCF_900176525.1  | <i>Lentzea albidocapillata</i> strain DSM 44073          | 43      | 8639486       | 68.7 | 369.3  |
| GCF_003350445.1  | <i>Lentzea flaviverrucosa</i> strain DSM 44664           | 38      | 9468454       | 69.2 | 202    |
| GCF_003265345.1  | <i>Lentzea terrae</i> strain NEAU-LZS 42                 | 145     | 10581732      | 68.6 | 254.9  |
| GCF_000719115.1  | <i>Lentzea albidocapillata</i> strain NRRL B-24057       | 127     | 8642480       | 68.7 | 334.6  |
| GCF_014646255.1  | <i>Lentzea pudingi</i> strain CGMCC 4.7319               | 63      | 9209394       | 69.1 | 774.2  |
| GCF_002150765.1  | <i>Lentzea kentuckyensis</i> strain NRRL B-24416         | 317     | 10210611      | 68.8 | 350.9  |
| GCF_007845675.1  | <i>Lentzea</i> sp. strain FXJ1.1311                      | 120     | 9370857       | 69.5 | 565.8  |
| GCF_001701025.1  | <i>Lentzea guizhouensis</i> strain DHS C013              | 1       | 9997872       | 70   | 348.4  |
| GCF_014653695.1  | <i>Lentzea cavernae</i> strain CGMCC 4.7367              | 43      | 9738650       | 69.6 | 694    |
| GCF_000974445.1  | <i>Lentzea aerocolonigenes</i> NBRC 13195                | 61      | 10698154      | 69   | 277    |
| GCF_003269295.1  | <i>Lentzea atacamensis</i> DSM 45479                     | 38      | 9306230       | 68.9 | 365    |
| GCF_016907955.1  | <i>Lentzea nigeriaca</i> DSM 45680                       | 42      | 9332327       | 68.4 | 742.5  |
| GCF_900100955.1  | <i>Lentzea fradiae</i> CGMCC 4.3506                      | 47      | 8508028       | 70.5 | 382.5  |
| GCF_003148865.1  | <i>Lentzea deserti</i> DSM 45480                         | 50      | 9529573       | 68.8 | 423.3  |
| GCF_900110955.1  | <i>Lentzea xinjiangensis</i> CGMCC 4.3525                | 61      | 8684108       | 68.9 | 378.4  |
| GCF_014648475.1  | <i>Lentzea flava</i> JCM 3296                            | 190     | 9721257       | 69   | 777.8  |
| GCF_000719205.1  | <i>Lentzea aerocolonigenes</i> NRRL B-3298               | 204     | 10648728      | 69   | 297    |
| GCF_021056325.1  | <i>Lentzea</i> sp. CC55                                  | 101     | 8269994       | 70.5 | 1008.6 |
| GCF_000374445.1  | <i>Actinokineospora enzanensis</i> strain DSM 44649      | 95      | 8119858       | 70.8 | 290.5  |
| GCF_014332375.1  | <i>Actinokineospora xionganensis</i> HBU206404           | 70      | 6813329       | 69.6 | 1050.5 |
| GCF_900111175.1  | <i>Actinokineospora terrae</i> strain DSM 44260          | 41      | 7588185       | 71   | 254.9  |
| GCF_001940455.1  | <i>Actinokineospora bangkokensis</i> strain DSM 44EHW    | 78      | 7453713       | 74   | 267.9  |
| GCF_003182415.1  | <i>Actinokineospora mزابensis</i> strain CECT 8578       | 32      | 7546603       | 72.8 | 117.7  |
| GCF_002934265.1  | <i>Actinokineospora auranticolor</i> strain YU 961-1     | 61      | 8431890       | 71.8 | 389    |
| GCF_000482865.1  | <i>Actinokineospora inagensis</i> strain DSM 44258       | 120     | 7278759       | 70.2 | 244.5  |
| GCF_000564855.1  | <i>Actinokineospora spheciospongiae</i> strain EG49      | 263     | 7529476       | 72.8 | 260.1  |
| GCF_003663795.1  | <i>Actinokineospora cianjurenensis</i> strain DSM 45657  | 19      | 7615874       | 70.9 | 173.4  |
| GCF_009745975.1  | <i>Actinokineospora pegani</i> strain TRM65233           | 137     | 6439512       | 72.6 | 81.3   |
| GCF_014648415.1  | <i>Actinokineospora fastidiosa</i> strain JCM 3276       | 30      | 7042850       | 72.5 | 1097.2 |
| GCF_004362515.1  | <i>Actinokineospora alba</i> DSM 45114                   | 1       | 7288615       | 69.7 | 409.8  |
| GCF_016907695.1  | <i>Actinokineospora baliensis</i> DSM 45656              | 1       | 7681387       | 70.6 | 971    |
| GCF_900101685.1  | <i>Actinokineospora iranica</i> IBRC-M 10403             | 44      | 6578763       | 70.8 | 205.3  |
| GCF_900099755.1  | <i>Actinokineospora alba</i> CPCC 201030                 | 35      | 7273063       | 69.7 | 471.7  |
| GCF_900104505.1  | <i>Actinokineospora alba</i> IBRC-M 10655                | 34      | 7268999       | 69.7 | 342.2  |
| GCF_021056305.1  | <i>Actinokineospora</i> sp. PR83                         | 182     | 7639714       | 72.7 | 1049.3 |
| GCF_900188345.1  | <i>Streptosporangium subroseum</i> CGMCC 4.2132          | 180     | 10782574      | 68.8 | 195.3  |
| GCF_014636435.1  | <i>Streptosporangium jomthongense</i> CGMCC 1.11045      | 55      | 4127297       | 55.8 | 0      |
| GCF_013409935.1  | <i>Streptosporangium sandarakinum</i> DSM 45763          | 4       | 7647619       | 72.5 | 961.3  |
| GCF_014203715.1  | <i>Streptosporangium saharensense</i> CECT 8840          | 26      | 8496112       | 70.3 | 1120.5 |
| GCF_014191075.1  | <i>Streptosporangium becharensense</i> CECT 8961         | 37      | 7762257       | 71.4 | 764.5  |
| GCF_014204985.1  | <i>Streptosporangium becharensense</i> DSM 46887         | 2       | 7824014       | 71.3 | 877.8  |
| GCF_000725815.1  | <i>Streptosporangium roseum</i> NRRL B-2638              | 308     | 10168636      | 70.6 | 230.6  |
| GCF_000721075.1  | <i>Streptosporangium amethystogenes</i> NRRL B-2639      | 229     | 9441077       | 69.4 | 211.4  |
| GCF_003203775.1  | <i>Streptosporangium</i> sp. 'caverna'                   | 1       | 11342172      | 68.9 | 384    |
| GCF_900113865.1  | <i>Streptosporangium canum</i> CGMCC 4.2126              | 91      | 9273799       | 70.7 | 229.6  |
| GCF_014648055.1  | <i>Streptosporangium pseudovulgare</i> JCM 3115          | 73      | 8586701       | 72.5 | 958.4  |
| GCF_014654615.1  | <i>Streptosporangium violaceochromogenes</i> JCM 3281    | 115     | 6265008       | 71.0 | 730.9  |
| GCF_014203795.1  | <i>Streptosporangium album</i> DSM 43023                 | 14      | 9022456       | 69.4 | 745    |
| GCF_000024865.1  | <i>Streptosporangium roseum</i> DSM 43021                | 2       | 10369518      | 70.9 | 267.9  |
| GCF_000401915.1  | <i>Thermobifida fusca</i> TM51                           | 88      | 3599272       | 47.6 | 339.3  |
| GCA_001313945.1  | <i>Thermobifida fusca</i> NBRC 14071 = JCM 3263          | 82      | 3643897       | 67.5 | 0      |
| GCF_015034585.1  | <i>Thermobifida fusca</i> UPMC 901                       | 1       | 3760927       | 67.4 | 175.5  |

|                  |                                                   |     |          |       |        |
|------------------|---------------------------------------------------|-----|----------|-------|--------|
| GCF_002939325.1  | <i>Thermobifida fusca</i> GAFM-TF-ZOO             | 129 | 3638186  | 67.5  | 0      |
| GCA_003242745.1  | <i>Thermobifida fusca</i> ZC4RG21                 | 204 | 3609530  | 67.6  | 0      |
| GCF_902797715.1  | <i>Thermobifida fusca</i> RUG14297                | 190 | 3506582  | 67.7  | 0      |
| GCF_000012405.1  | <i>Thermobifida fusca</i> YX                      | 1   | 3642249  | 67.5  | 169.7  |
| GCF_001660385.1  | <i>Thermobifida halotolerans</i> YIM 90462        | 74  | 5453353  | 70.8  | 265.3  |
| GCF_003574835.2  | <i>Thermobifida halotolerans</i> DSM 44931        | 314 | 5217717  | 70.9  | 314.3  |
| GCF_001517975.1  | <i>Thermobifida cellulositytica</i> TB100         | 19  | 4430365  | 70.4  | 288.3  |
| GCF_009498035.1  | <i>Saccharothrix syringae</i> NRRL B-16468        | 1   | 10929570 | 73.4  | 108.4  |
| GCF_003752005.1  | <i>Saccharothrix texasensis</i> DSM 44231         | 1   | 9178199  | 72.2  | 147.1  |
| GCF_014203665.1  | <i>Saccharothrix tamanrassetensis</i> CECT 8640   | 31  | 8053586  | 71.4  | 1122.1 |
| GCF_001984175.1  | <i>Saccharothrix ecbatanensis</i> DSM 45486       | 1   | 9689237  | 70.1  | 1199.7 |
| GCF_000328705.1  | <i>Saccharothrix espanaensis</i> DSM 44229        | 1   | 9360653  | 72.1  | 252.6  |
| GCF_003014735.1  | <i>Saccharothrix carnea</i> CGMCC 4.7097          | 40  | 8918169  | 71.4  | 157.3  |
| GCF_001280085.1  | <i>Saccharothrix</i> sp. NRRL B-16348             | 279 | 10896489 | 71.3  | 209.2  |
| GCF_000716595.1  | <i>Saccharothrix</i> sp. NRRL B-16314             | 273 | 8934493  | 71.1  | 275.2  |
| GCF_001905065.1  | <i>Saccharothrix</i> sp. CB00851                  | 66  | 9304003  | 71.2  | 210.6  |
| GCF_001984175.1  | <i>Saccharothrix</i> sp. ALI-22-1 strain ALI-22-1 | 69  | 10300059 | 70.1  | 345.2  |
| GCF_003634935.1  | <i>Saccharothrix australiensis</i> DSM 43800      | 3   | 7861373  | 73.4  | 233.8  |
| GCF_009769385.1  | <i>Saccharothrix</i> sp. BMP B8144                | 162 | 10832261 | 70.3  | 290.1  |
| GCF_016695385.1  | <i>Saccharothrix</i> sp. 6-C                      | 1   | 9045220  | 72.3  | 272.2  |
| GCF_014648515.1  | <i>Saccharothrix coeruleofusca</i> JCM 3313       | 61  | 7692265  | 72.6  | 1084   |
| GCF_014203755.1  | <i>Saccharothrix violaceirubra</i> DSM 45084      | 1   | 7354386  | 71.2  | 994.5  |
| GCF_003634995.1  | <i>Saccharothrix variisporea</i> DSM 43911        | 1   | 9408895  | 71.6  | 339.8  |
| GCF_006716745.1  | <i>Saccharothrix saharensis</i> DSM 45456         | 1   | 8924967  | 72.2  | 211.5  |
| GCF_000236985.1  | <i>Saccharomonospora azurea</i> SZMC 14600        | 216 | 4973727  | 70.3  | 0      |
| GCF_011761185.1  | <i>Saccharomonospora amisosensis</i> DSM 45685    | 3   | 5534940  | 68.5  | 555.5  |
| GCF_000527075.1  | <i>Saccharomonospora</i> sp. CNQ490               | 25  | 4941689  | 71.1  | 244.5  |
| GCF_015910535.1  | <i>Saccharomonospora</i> sp. NB11                 | 29  | 4299407  | 69.8  | 1148.4 |
| GCF_000787535.1  | <i>Saccharomonospora viridis</i> JCM 3315         | 13  | 4304348  | 67.3  | 0      |
| GCF_900115515.1  | <i>Saccharomonospora viridis</i> ATCC 33517       | 12  | 4308214  | 67.3  | 0      |
| GCF_001942305.1  | <i>Saccharomonospora</i> sp. CUA-673              | 85  | 5421117  | 69.9  | 666.7  |
| GCF_004519465.1  | <i>Saccharomonospora</i> sp. 31sw                 | 1   | 4713652  | 69.0  | 0      |
| GCF_000023865.1  | <i>Saccharomonospora viridis</i> DSM 43017        | 1   | 4308349  | 67.3  | 0      |
| GCF_002077655.1  | <i>Saccharomonospora piscinae</i> strain 06168H-1 | 11  | 4897614  | 71.0  | 79.6   |
| GCF_000231055.2  | <i>Saccharomonospora azurea</i> NA-128            | 93  | 4662072  | 64.1  | 238    |
| GCF_000244975.1  | <i>Saccharomonospora cyanea</i> NA-134            | 5   | 5407901  | 69.7  | 254.6  |
| GCF_000244955.1  | <i>Saccharomonospora marina</i> XMU15             | 8   | 5964893  | 68.9  | 182.4  |
| GCF_000258175.1  | <i>Saccharomonospora xinjiangensis</i> XJ-54      | 16  | 4774606  | 68.9  | 156.3  |
| GCF_000243395.2  | <i>Saccharomonospora glauca</i> K62               | 11  | 4563208  | 69.1  | 91.6   |
| GCA_000374705.1  | <i>Salinispora pacifica</i> CNS860                | 72  | 5351008  | 69.6  | 210.4  |
| GCA_000383995.1  | <i>Salinispora pacifica</i> DSM 45543             | 2   | 5458189  | 69.6  | 171.8  |
| GCA_000378845.1  | <i>Salinispora pacifica</i> DSM 45544             | 29  | 5462252  | 69.9  | 374.3  |
| GCA_000374745.1  | <i>Salinispora pacifica</i> CNS996                | 119 | 5658754  | 69.6  | 252    |
| GCA_000514535.1  | <i>Salinispora pacifica</i> CNT001                | 89  | 5488014  | 69.8  | 178.1  |
| GCA_000514575.1  | <i>Salinispora pacifica</i> CNT003                | 138 | 5468952  | 69.9  | 248.9  |
| GCA_000514515.1  | <i>Salinispora pacifica</i> CNT029                | 45  | 5233191  | 69.8  | 280.2  |
| GCA_000374765.1  | <i>Salinispora pacifica</i> CNT045                | 90  | 5768959  | 69.6  | 271.2  |
| GCA_000514495.1  | <i>Salinispora pacifica</i> CNT084                | 142 | 5468756  | 69.6  | 272.4  |
| GCA_000374785.1  | <i>Salinispora pacifica</i> CNT124                | 55  | 5160007  | 69.8  | 558    |
| GCA_000383575.1  | <i>Salinispora pacifica</i> DSM 45547             | 15  | 5445911  | 69.8  | 227.5  |
| GCA_000378825.1  | <i>Salinispora pacifica</i> DSM 45548             | 10  | 5096990  | 69.9  | 374.3  |
| GCA_000379065.1  | <i>Salinispora pacifica</i> DSM 45549             | 37  | 5194796  | 69.4  | 313.2  |
| GCA_000514815.1  | <i>Salinispora pacifica</i> CNT569                | 48  | 5232086  | 69.2  | 350.2  |
| GCA_000514415.1  | <i>Salinispora pacifica</i> CNT603                | 81  | 5394462  | 69.9  | 79.1   |
| GCA_000375245.1  | <i>Salinispora pacifica</i> CNT584                | 83  | 5216172  | 69.7  | 400.6  |
| GCA_000375265.1  | <i>Salinispora pacifica</i> CNT609                | 105 | 5325580  | 69.6  | 213.6  |
| GCA_000424925.1  | <i>Salinispora pacifica</i> CNY239                | 92  | 5366811  | 69.9  | 157.7  |
| GCF_010671825.1  | <i>Micromonospora terminaliae</i> TMS7            | 40  | 6699733  | 73.35 | 322.6  |
| GCF_003626635.1  | <i>Micromonospora musae</i> MS1-9                 | 34  | 7069771  | 72.2  | 302.4  |
| GCF_0003626545.1 | <i>Micromonospora musae</i> NGC1-4                | 28  | 7058875  | 72.2  | 231.5  |
| GCF_000297395.2  | <i>Micromonospora lupini</i> str. Lupac 08        | 50  | 7325824  | 71.9  | 244.5  |
| GCF_003583405.1  | <i>Micromonospora radialis</i> AZ1-13             | 83  | 5963223  | 71.9  | 335.6  |
| GCF_003626655.1  | <i>Micromonospora costis</i> CS1-12               | 20  | 7182425  | 73    | 222.9  |
| GCF_016598485.1  | <i>Micromonospora veneta</i> CAP181T              | 137 | 6799777  | 72.4  | 330.7  |

|                 |                                               |     |          |      |       |
|-----------------|-----------------------------------------------|-----|----------|------|-------|
| GCF_016741875.1 | <i>Streptomyces coffeae</i> CA1R205           | 253 | 9896405  | 70.7 | 939.4 |
| GCF_009755605.1 | <i>Streptomyces typhae</i> p1417              | 69  | 9812178  | 72   | 223   |
| GCF_014649775.1 | <i>Streptomyces longisporoflavus</i> JCM 396  | 168 | 9802249  | 70.5 | 525.3 |
| GCF_006334995.2 | <i>Streptomyces mimosae</i> 3MP-10            | 45  | 7198341  | 73.4 | 297.1 |
| GCF_003024195.1 | <i>Streptomyces dioscori</i> A217             | 57  | 10239468 | 70.7 | 269.1 |
| GCF_002237655.1 | <i>Streptomyces</i> sp. XY006                 | 74  | 8251847  | 71.8 | 288.8 |
| GCF_008973465.1 | <i>Streptomyces</i> sp. SS1-1                 | 4   | 7815656  | 71.8 | 90.9  |
| GCF_021390935.1 | <i>Streptomyces</i> 8s0. CC228A               | 24  | 6857711  | 73.6 | 546.4 |
| GCF_009025935.1 | <i>Streptomyces</i> 8s0. CC208B               | 110 | 6898902  | 71.8 | 524.2 |
| GCF_021390895.1 | <i>Streptomyces</i> 8s0. CC210A               | 8   | 7222961  | 73.4 | 582.1 |
| GCA_021390875.1 | <i>Streptomyces</i> 8s0. CC219A               | 382 | 7585741  | 73.5 | 450.6 |
| GCA_003352875.1 | <i>Pseudomonas fluorescens</i> strain NEP1    | 1   | 6313875  | 60.6 | 144.4 |
| GCA_002287825.1 | <i>Pseudomonas moraviensis</i> strain TYU6    | 1   | 6124581  | 60.3 | 178.9 |
| GCA_003293395.1 | <i>Pseudomonas thivervalensis</i> strain PLM3 | 1   | 6591188  | 61.2 | 211   |
| GCA_000152545.1 | <i>Pseudomonas aeruginosa</i> 2192            | 1   | 6905121  | 66.2 | 78.9  |
| CP021986        | <i>Pseudomonas fragi</i> strain DBC           | 1   | 5015937  | 54.1 | 216.8 |
| CP022198        | <i>Pseudomonas oryzihabitans</i> strain MS8   | 1   | 5038716  | 65.5 | 247.1 |
| CP020369        | <i>Pseudomonas tolaasii</i> strain 2192T      | 1   | 6856683  | 60.5 | 207.5 |
| JACCAH000000000 | <i>Pseudomonas composti</i> strain ZKA28      | 1   | 5672870  | 62.5 | 412.6 |
| JACCAJ000000000 | <i>Pseudomonas kunmingensis</i> strain ZKA55  | 1   | 4620945  | 62.8 | 130.7 |
| GCA_000022145.1 | <i>Anaeromyxobacter dehalogenans</i> 2CP-1    | 1   | 5029329  | 74.7 | 166   |
| GCA_001027285.1 | <i>Archangium gephyra</i>                     | 1   | 12489432 | 69.4 | 259.9 |
| GCA_001189295.1 | <i>Chondromyces crocatus</i>                  | 1   | 11388132 | 68.7 | 231.5 |
| GCA_000255295.1 | <i>Coralloccoccus coralloides</i> DSM 2259    | 1   | 10080619 | 69.9 | 230.6 |
| GCA_000024805.1 | <i>Haliangium ochraceum</i> DSM 14365         | 1   | 9446314  | 69.5 | 331.1 |
| GCA_002305855.1 | <i>Melittangium boletus</i> DSM 14713         | 1   | 9910441  | 68.4 | 392.5 |
| GCA_000331735.1 | <i>Myxococcus stipitatus</i> DSM 14675        | 1   | 10350586 | 69.2 | 195.9 |
| GCA_000012685.1 | <i>Myxococcus xanthus</i> DK 1622             | 1   | 9139763  | 68.9 | 109.7 |
| CP070226        | <i>Sandaracinus amylolyticus</i>              | 2   | 10963797 | 71.6 | 431.2 |
| GCA_000067165.1 | <i>Sorangium cellulosum</i> So ce56           | 1   | 13033779 | 71.4 | 346.6 |
| GCA_000380545.1 | <i>Corynebacterium crenatum</i> MT            | 48  | 3346700  | 53.9 | 0     |
| GCA_002775095.1 | <i>Corynebacterium striatum</i> strain 2023   | 41  | 2375104  | 59.5 | 0     |
| GCA_019288275.1 | <i>Aspergillus niger</i> strain CBS 554.65    | 17  | 40430000 | 49.6 | 210   |
| GCA_000149555.1 | <i>Fusarium verticillioides</i> 7600          | 37  | 41840000 | 48.7 | 254   |
|                 | <i>Fusarium fujikuroi</i> strain CSV1         | 105 |          |      | 195   |
| GCA_009663055.1 |                                               |     | 43720000 | 47.5 |       |
| GCA_000993785   | <i>Streptomyces xiamenensis</i> 318           | 1   | 5961402  | 72   | 174.1 |
| GCF_003675955.1 | <i>Streptomyces rapamycinicus</i> NRRL 5491   | 4   | 12700000 | 71   | 201.9 |
| GCA_000203835.1 | <i>Streptomyces coelicolor</i> A32            | 1   | 9055000  | 71.5 | 57.5  |

**Supplementary table 2.** Pan-genome statistics for *Lentzea* and *Actinokineospora* genera.

|                        | Organism name                          | No. Core genes | No. accessory genes | No. of unique genes | No. exclusively absent genes |
|------------------------|----------------------------------------|----------------|---------------------|---------------------|------------------------------|
| <b>Lentzea</b> genomes | <i>L. aerocolonigenes</i> NBRC 13195   | 3344           | 6065                | 45                  | 1                            |
|                        | <i>L. albidocapillata</i> DSM 44073    | 3344           | 4450                | 46                  | 1                            |
|                        | <i>L. albidocapillata</i> NRRL B-24057 | 3344           | 4457                | 51                  | 1                            |
|                        | <i>L. flaviverrucosa</i> CGMCC 4.578   | 3344           | 5269                | 62                  | 1                            |
|                        | <i>L. flaviverrucosa</i> DSM 44664     | 3344           | 5268                | 66                  | 5                            |
|                        | <i>L. aerocolonigenes</i> NRRL B-3298  | 3344           | 6068                | 85                  | 0                            |
|                        | <i>L. sp.</i> CC55                     | 3344           | 3822                | 568                 | 11                           |

|                                                            |      |      |      |     |
|------------------------------------------------------------|------|------|------|-----|
| <i>L. atacamensis</i> DSM 45479                            | 3344 | 4718 | 676  | 8   |
| <i>L. deserti</i> DSM 45480                                | 3344 | 4849 | 683  | 3   |
| <i>L. albida</i> DSM 44437                                 | 3344 | 4470 | 694  | 9   |
| <i>L. albidocapillata</i> subsp. <i>violacea</i> DSM 44796 | 3344 | 3874 | 701  | 22  |
| <i>L. jiangxiensis</i> CGMCC 4.6609                        | 3344 | 3821 | 774  | 22  |
| <i>L. alba</i> NEAU.D13                                    | 3344 | 4865 | 791  | 3   |
| <i>L. nigeriaca</i> DSM 45680                              | 3344 | 4305 | 804  | 17  |
| <i>L. waywayandensis</i> DSM 44232                         | 3344 | 4815 | 812  | 7   |
| <i>L. fradie</i> CGMCC 4.3506                              | 3344 | 3574 | 843  | 81  |
| <i>L. cavernae</i> CGMCC 4.7367                            | 3344 | 4710 | 871  | 6   |
| <i>L. kentuckyensis</i> NRRL B-24416                       | 3344 | 4686 | 918  | 40  |
| <i>L. flava</i> JCM 3296                                   | 3344 | 4545 | 935  | 3   |
| <i>L. pudingi</i> CGMCC 4.7319                             | 3344 | 4267 | 954  | 6   |
| <i>L. terrae</i> NEAU-LZS 42                               | 3344 | 5080 | 1016 | 17  |
| <i>L. xinjiangensis</i> CGMCC 4.3525                       | 3344 | 3543 | 1176 | 47  |
| <i>L. guizhouensis</i> DHS C013                            | 3344 | 4336 | 1668 | 40  |
| <i>L. sp.</i> FXJ1.1311                                    | 3344 | 2450 | 2561 | 521 |

|                          | <b>Organism name</b>             | <b>No. Core genes</b> | <b>No. accessory genes</b> | <b>No. of unique genes</b> | <b>No. exclusively absent genes</b> |
|--------------------------|----------------------------------|-----------------------|----------------------------|----------------------------|-------------------------------------|
| Actinokineospora genomes | <i>A. enzaensis</i> DSM 44649    | 1956                  | 3218                       | 2176                       | 18                                  |
|                          | <i>A. auranticolor</i> YU 961-1  | 1956                  | 3501                       | 2111                       | 8                                   |
|                          | <i>A. fastidiosa</i> JCM 3276    | 1956                  | 2382                       | 2044                       | 85                                  |
|                          | <i>A. iranica</i> IBRC-M 10403   | 1956                  | 2467                       | 1691                       | 41                                  |
|                          | <i>A. bangkoensis</i> DSM 44EHW  | 1956                  | 2841                       | 1566                       | 24                                  |
|                          | <i>A. inagensis</i> DSM 44258    | 1956                  | 3061                       | 1525                       | 23                                  |
|                          | <i>A. baliensis</i> DSM 45656    | 1956                  | 3492                       | 1276                       | 5                                   |
|                          | <i>A. pegani</i> TRM 65233       | 1956                  | 2557                       | 1263                       | 52                                  |
|                          | <i>A. sp.</i> PR83               | 1956                  | 3855                       | 965                        | 9                                   |
|                          | <i>A. xionganensis</i> HBU206404 | 1956                  | 3341                       | 935                        | 12                                  |
|                          | <i>A. cianjurensis</i> DSM 45657 | 1956                  | 3995                       | 825                        | 6                                   |
|                          | <i>A. terrae</i> DSM 44260       | 1956                  | 4103                       | 591                        | 2                                   |
|                          | <i>A. spheciospongiae</i> EG49   | 1956                  | 4279                       | 399                        | 1                                   |
|                          | <i>A. mzabensis</i> CECT 8578    | 1956                  | 4276                       | 398                        | 1                                   |
|                          | <i>A. alba</i> IBRC-M 10655      | 1956                  | 4456                       | 22                         | 0                                   |
|                          | <i>A. alba</i> CPCC 201030       | 1956                  | 4461                       | 18                         | 0                                   |

**Supplementary table 3.** AntiSMASH results for *Lentzea* sp. CC55 (only complete BGCs) and GCF associated.

| Region      | Type                            | From   | To     | Most similar known cluster                            |                      | Similarity | GCF#                |
|-------------|---------------------------------|--------|--------|-------------------------------------------------------|----------------------|------------|---------------------|
| Region 8.1  | siderophore                     | 70618  | 83429  |                                                       |                      |            | 2195                |
| Region 13.2 | terpene                         | 255867 | 276793 | isorenieratene                                        | Terpene              | 0.75       | 2045                |
| Region 17.1 | LAP,thiopeptide                 | 29780  | 57586  |                                                       |                      |            | 2037                |
| Region 18.1 | T3PKS                           | 69039  | 110076 | alkyl-O-dihydrogeranyl-methoxyhydroquinones           | Terpene + Polyketide | 0.57       | 2520                |
| Region 19.1 | RiPP-like                       | 27080  | 37898  | enduracidin                                           | NRP                  | 0.04       | 2490                |
| Region 19.2 | PKS-like,indole,NRPS,T1PKS      | 146710 | 250749 | fortimicin                                            | Saccharide           | 0.06       | 2005,2173,2398,2522 |
| Region 19.3 | lanthipeptide-class-ii          | 351062 | 373707 |                                                       |                      |            | 2047                |
| Region 22.1 | redox-cofactor                  | 140124 | 162166 | lankacidin C                                          | NRP + Polyketide     | 0.26       | 2175                |
| Region 27.1 | NRPS-like                       | 35700  | 79563  | indigoidine                                           | Saccharide           | 0.06       | 2527                |
| Region 27.2 | terpene                         | 96938  | 119082 | geosmin                                               | Terpene              | 1          | 2528                |
| Region 33.1 | NAPAA                           | 2611   | 36348  |                                                       |                      |            | 2154                |
| Region 34.1 | NRPS                            | 66342  | 111786 | dechlorocuracomycin                                   | NRP                  | 0.12       | 2531                |
| Region 46.1 | NRPS                            | 103568 | 154430 | coelichelin                                           | NRP                  | 0.72       | 2007                |
| Region 47.1 | T2PKS,PKS-like,RRE-containing   | 198168 | 270647 | LL-D49194 $\alpha$ 1 (LLD) antitumor                  | Polyketide           | 0.32       | 2202                |
| Region 47.2 | lanthipeptide-class-iii         | 284572 | 307136 | Ery-9 / Ery-6 / Ery-8 / Ery-7 / Ery-5 / Ery-4 / Ery-3 | RiPP:Lanthipeptide   | 0.75       | 2524                |
| Region 54.1 | betalactone                     | 38923  | 69839  | platencin                                             | Terpene              | 0.06       | 2008                |
| Region 54.2 | terpene                         | 92689  | 113762 | 2-methylisoborneol                                    | Terpene              | 0.5        | 2040                |
| Region 55.1 | NRPS-like,PKS-like,T2PKS        | 126166 | 238151 | xantholipin                                           | Polyketide           | 0.12       | 204,2537            |
| Region 55.2 | T1PKS                           | 283753 | 328261 | 4-Z-annimycin                                         | Polyketide           | 0.33       | 2538                |
| Region 57.1 | T1PKS                           | 84     | 50680  | pimaricin                                             | Polyketide           | 0.29       | 2539                |
| Region 57.2 | NRPS-like                       | 52748  | 109991 | napsamycin A-D / mureidomycin A-B                     | NRP: + Nucleoside    | 0.13       | 2540                |
| Region 57.3 | NRPS,CDPS,T1PKS                 | 120986 | 222233 | coelibactin                                           | NRP                  | 0.36       | 2541                |
| Region 57.4 | PKS-like,arylpolyene,T1PKS,NRPS | 493491 | 592270 | virginiamycin S1                                      | NRP + Polyketide     | 0.22       | 2542                |
| Region 57.5 | terpene                         | 678213 | 700280 | geosmin                                               | Terpene              | 1          | 1918                |

**Supplementary table 4.** AntiSMASH results for *Actinokineospora* sp. PR83 (only complete BGCs) and GCF associated.

| Region       | Type                            | From   | To     | Most similar Known cluster          | Similarity                                                | GCF# |          |
|--------------|---------------------------------|--------|--------|-------------------------------------|-----------------------------------------------------------|------|----------|
| Region 5.1   | NRPS,T1PKS,PKS-like             | 304    | 98061  | chlorothricin /<br>deschlorothricin | Polyketide:Modular<br>type I + Polyketide +<br>Saccharide | 0.09 | 2301     |
| Region 10.1  | NRPS,arylpolyene                | 22016  | 91909  | atratumycin                         | NRP                                                       | 0.26 | 2065     |
| Region 11.1  | CDPS                            | 71619  | 92335  | apramycin                           | Saccharide                                                | 0.06 | 2303     |
| Region 16.1  | transAT-PKS,PKS-like,T1PKS      | 68105  | 171100 | kalimantacin A                      | NRP +<br>Polyketide:Modular<br>type I                     | 0.24 | 2304     |
| Region 17.1  | NRPS                            | 5612   | 69419  | gobichelin A /<br>gobichelin B      | NRP                                                       | 0.44 | 2305     |
| Region 24.1  | RiPP-like                       | 69161  | 81038  |                                     |                                                           |      | 2209     |
| Region 24.2  | other,PKS-like,amglyccycl,T1PKS | 114918 | 183437 | cetoniacytone A<br>antitumor        | Other:Cyclitol                                            | 0.38 | 2212     |
| Region 24.3  | T1PKS,NRPS-like                 | 267645 | 360948 | streptovaricin                      | Polyketide                                                | 0.65 | 188,2308 |
| Region 35.1  | T2PKS                           | 90495  | 163028 | JBIR-76 / JBIR-<br>77               | Polyketide                                                | 0.56 | 2311     |
| Region 38.1  | NAPAA                           | 2306   | 36265  | dynemicin A                         | Polyketide                                                | 0.03 | 2175     |
| Region 40.1  | T2PKS                           | 83180  | 155671 | saquayamycin<br>A                   | Polyketide                                                | 0.25 | 277      |
| Region 59.1  | RiPP-like                       | 3596   | 14405  |                                     |                                                           |      | 53       |
| Region 79.2  | T2PKS,ectoine                   | 99927  | 140302 | kosinostatin                        | NRP + Polyketide                                          | 0.11 | 2315     |
| Region 80.1  | terpene                         | 78429  | 99409  | oxalomycin B                        | NRP + Polyketide                                          | 0.09 | 2316     |
| Region 80.2  | siderophore                     | 116820 | 128580 | macrotetrolide                      | Polyketide                                                | 0.33 | 2165     |
| Region 87.1  | furan                           | 4405   | 25403  | methylenomycin<br>A                 | Other                                                     | 0.14 | 2318     |
| Region 108.1 | T1PKS                           | 1      | 4644   |                                     |                                                           |      | 2234     |
| Region 114.1 | T1PKS                           | 1      | 4864   |                                     |                                                           |      | 2234     |

**Supplementary figure 1.** KEGG distribution for core, accessory and unique genes for **A.** *Lentzea* and **B.** *Actinokineospora*.

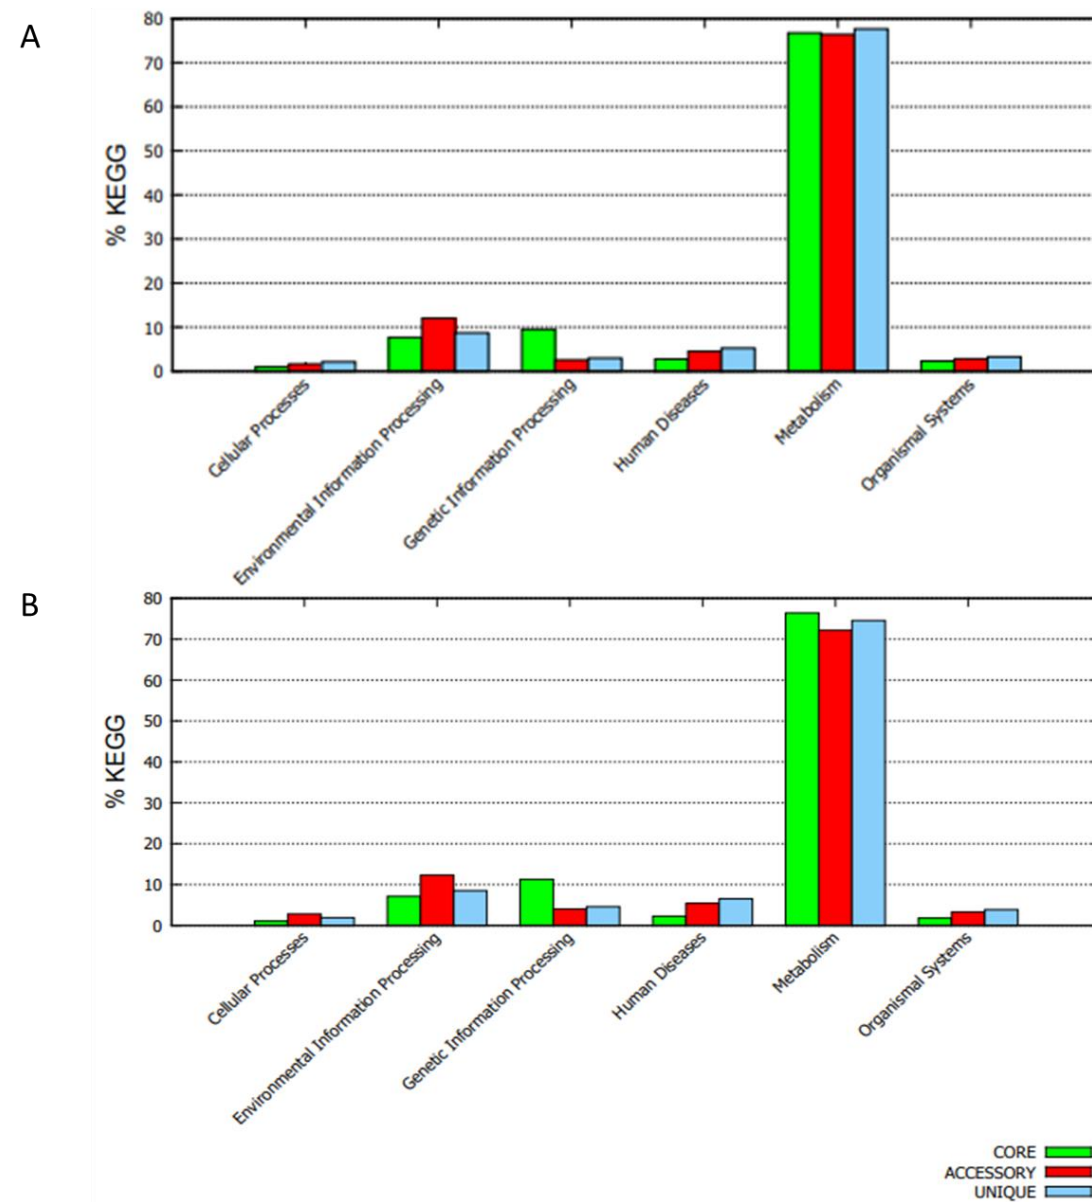

Supplement: mgen-9-921-s001.pdf [file mgen-9-921-s001.pdf]
